# Supplementary material
Source: MDPI journal article supplement (https://www.mdpi.com/2075-163X/12/6/777)
Supplement: s1 [file s1]

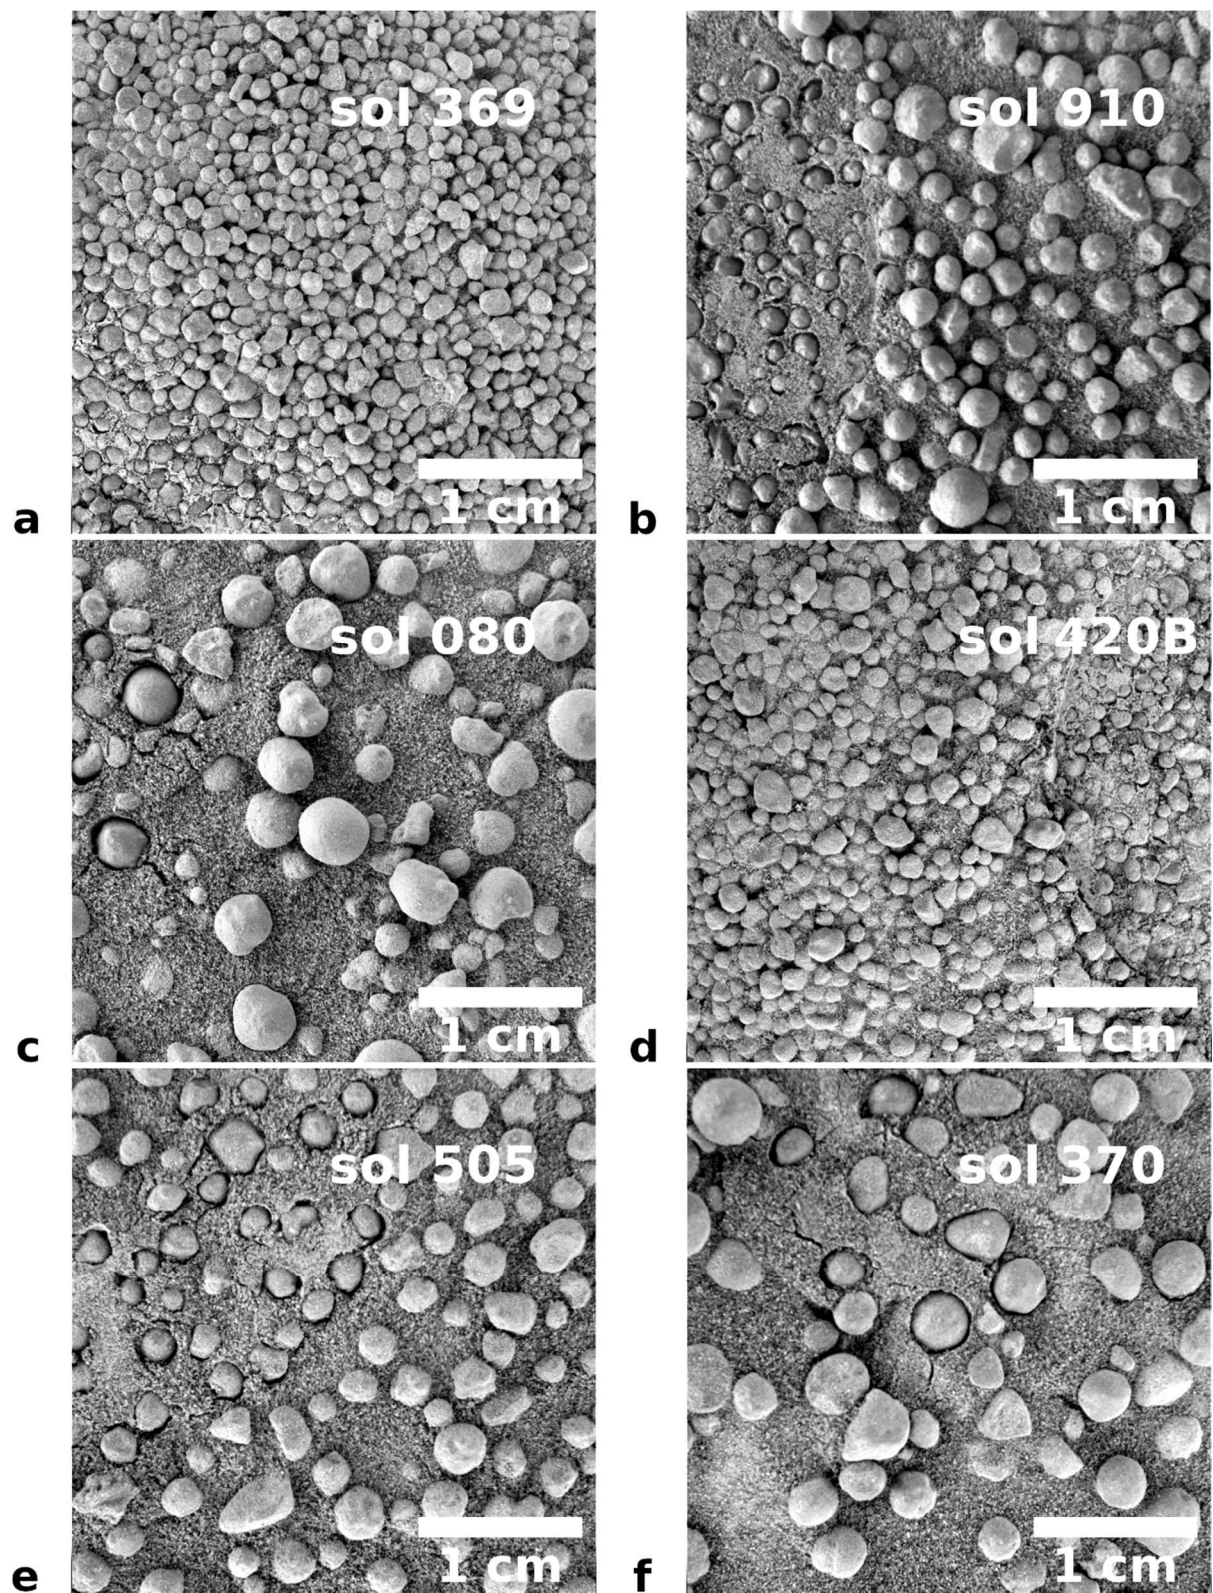

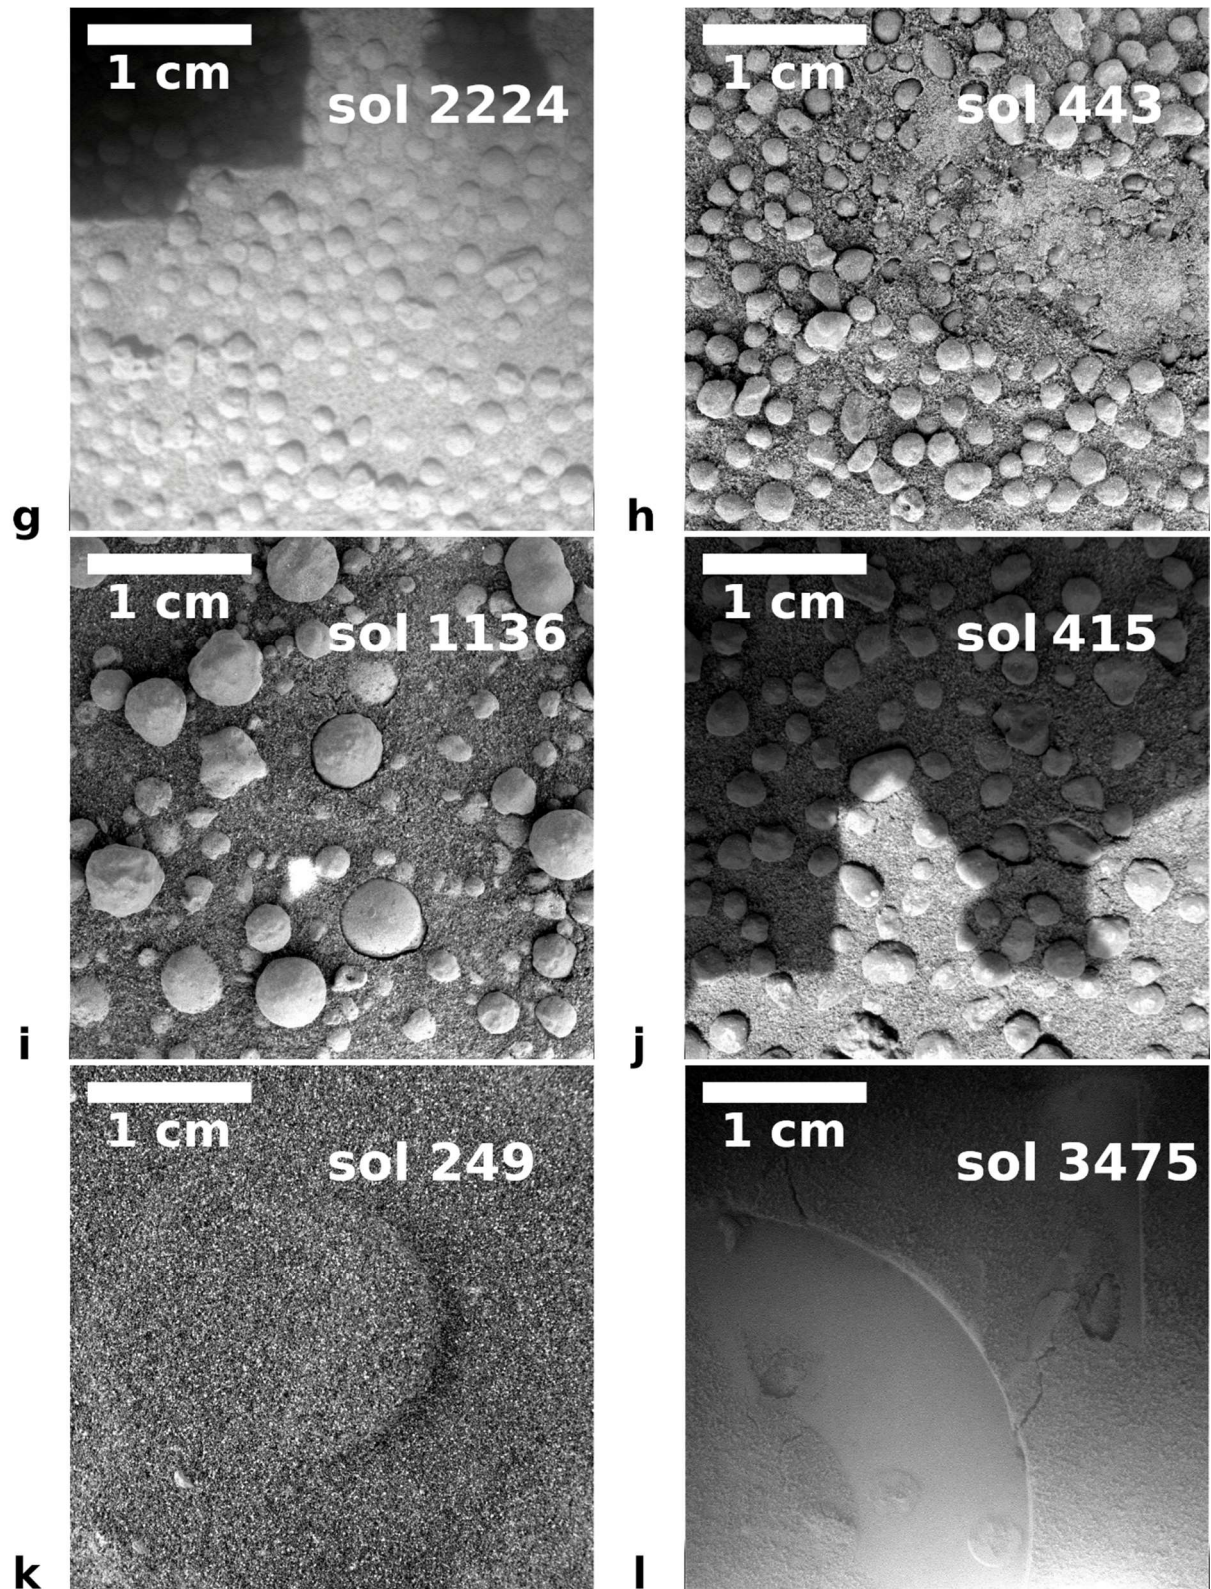

**Figure S1.** Blueberry sampling targets. These are discussed in the main text and Appendix A. The order given follows the distribution order in the largest block in the matrix given in Figure 1. The sol on which each target was photographed is overlaid. NASA's *Opportunity* archive IDs for these images are (in order): (a) 1M160940202EFF42D9P2956M2M1.JPG, (b) 1M208971634EFF748BP2957M2M1.JPG, (c) 1M135292637EFF10CGP2956M2M1.JPG, (d) 1M165468362EFF5208P2956M2M1.JPG, (e) 1M173018037EFF55VWP2956M2M1.JPG, and (f) 1M161026325EFF42D9P2957M2M1.JPG.

The image given for distribution B416 was actually taken on sol 415 – the archive had no image that definitely shows the sampling target for distribution B416. NASA's *Opportunity* archive IDs for these images are (in order): (g) 1M325620114EFFAG00P2939M2M1.JPG, (h) 1M167510573EFF55B0P2956M2M1.JPG, (i) 1M229031407EFF81D2P2936M2M1.JPG, (j) 1M165026294EFF5200P2956M2M1.JPG, (k) 1M150287403EFF3620P2976M2M1.JPG, and (l) 1M436679762EFFC9EIP2935M2M1.JPG.
